# Supplementary material for: Does capecitabine maintenance therapy versus active monitoring confer a survival benefit after first-line treatment of metastatic colorectal cancer? A meta-analysis of randomized controlled trials
Source: Research Square preprint supplement (doi:10.21203/rs.3.rs-2054864/v1), 2022-11-21
Supplement: Supplementary file 1 [file 18191411371bdf27510df628.docx]

**Appendix Table A.1** **The primary and secondary outcome indicators included in the study.**

| Publication | R. A. Adams 2021 | | R. Geng2020 | | K. K. H. Goey2017 | | H. Y. Luo2016 | | | L. H. J. Simkens2015 | | | |
| --- | --- | --- | --- | --- | --- | --- | --- | --- | --- | --- | --- | --- | --- |
| Study type | RCT |  | RCT |  | RCT |  | RCT |  | RCT | |  | |
| CAP therapy (mg/m2) | 1000 |  | 500 |  | 1000 |  | 1000 |  | 1000 | |  | |
| Primary endpoint | PFS | OS | PFS | OS | PFS | OS | PFS | OS | PFS | | OS | |
| Median PFS (months) | 3.88 | vs. 1.87 | 5.66 | vs. 3.98 | 11.6 | vs. 8.6 | 10.43 | vs. 7.82 | 11.7 | | | vs. 8.5 |
| HR for PFS | 0.40(0.21-0.75) | | 0.11(0.04-0.26) | | 0.64(0.53-0.77) | | 0.51(0.40-0.66) | | 0.63(0.53-0.77) | | | |
| Secondary outcome |  |  |  |  |  |  |  |  |  | | |  |
| Median OS (months) | 14.8 | vs. 15.2 | 23.82 | vs. 21.81 | 21.6 | vs. 18.2 | 25.63 | vs. 23.3 | 21.6 | | | vs. 18.1 |
| HR for OS | 0.93(0.69-1.27) | | 0.49(0.21-1.11) | | 0.86(0.71-1.03) | | 0.85(0.64-1.11) | | 0.83(0.68-1.01) | | | |
| (Event/total) | CAP | AM | CAP | AM | CAP | AM | CAP | AM | CAP | | | AM |
| BRAF mutation | 17(115) | 13(116) | NR | NR | 15(30) | 15(30) | NR | NR | NR | | | NR |
| RAS mutation | 68(116) | 68(115) | NR | NR | 112(240) | 128(240) | NR | NR | NR | | | NR |
| RAS/BRAF Wild type | 103(115) | 98(116) | NR | NR | 79(140) | 61(140) | NR | NR | NR | | | NR |
| Hematological |  |  |  |  |  |  |  |  |  | | |  |
| Neutropenia | 3(127) | 2(127) | 2(25) | 1(22) | NR | NR | 17(136) | 9(138) | NR | | | NR |
| Anemia | 3(127) | 1(127) | 1(25) | 1(22) | NR | NR | 2(136) | 3(138) | NR | | | NR |
| Thrombocytopenia | NR | NR | 1(25) | 1(22) | NR | NR | 9(136) | 6(138) | NR | | | NR |
| Non-hematological |  |  |  |  |  |  |  |  |  | | |  |
| Diarrhea | 6(127) | 3(127) | 1(25) | 1(22) | NR | NR | 4(136) | 2(138) | NR | | | NR |
| Nausea/vomiting | 2(127) | 2(127) |  |  | NR | NR | 6(136) | 5(138) | NR | | | NR |
| Mucositis | 0(127) | 0(127) | 1(25) | 0(22) | NR | NR | 8(136) | 4(138) | NR | | | NR |
| Hand-foot skin reaction | 3(127) | 0(127) | 2(25) | 1(22) | NR | NR | 8(136) | 1(138) | 64(278) | | | 0(279) |
| Death | 99(127) | 90(127) | 12(25) | 12(22) | 263(278) | 239(279) | 101(136) | 107(138) | 229(278) | | | 239(279) |
|  |  |  |  |  |  |  |  |  | |  | |  | |

CAP, capecitabine; AM, active monitoring; HR: hazard ratio; OS: overall survival; PFS: progression-free survival; NR, none or not reported.
