# Supplementary material for: Does capecitabine maintenance therapy versus active monitoring confer a survival benefit after first-line treatment of metastatic colorectal cancer? A meta-analysis of randomized controlled trials
Source: Research Square preprint supplement (doi:10.21203/rs.3.rs-2054864/v1), 2022-11-21
Supplement: Supplementary file 2 [file dcef53c79a01d77d3109d593.docx]

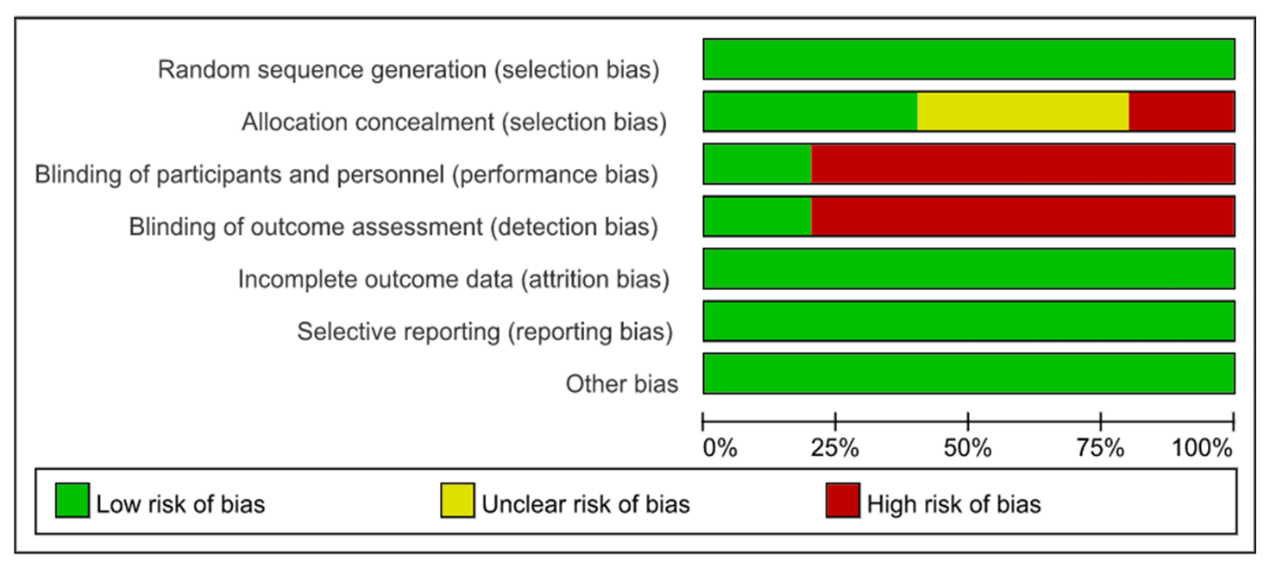


**Figure A. 1 Risk of bias graph: each risk of bias item presented as the percentages among all included studies.**


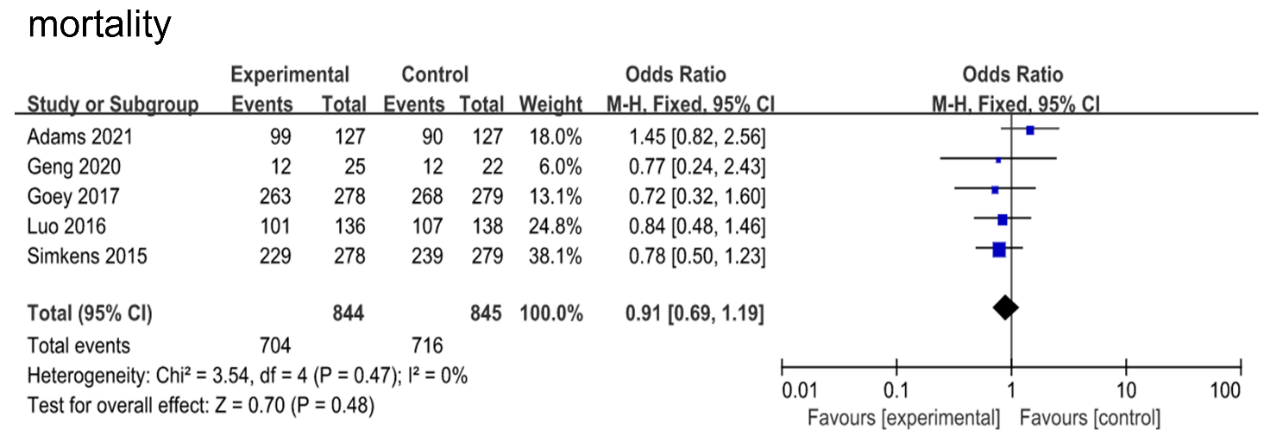


**Figure A.2: Capecitabine maintenance therapy Versus Active Monitoring mortality.**
